# Supplementary material
Source: Springer Nature journal article supplement (https://www.springermedizin.de/resource/supplementary/13014_2013_881_MOESM2_ESM.pdf/9634340)

W-TF

53.0  
50.0  
47.5  
40.0  
30.0  
20.0  
10.0

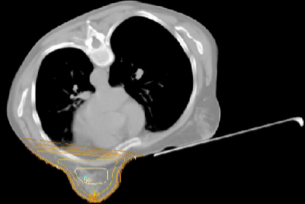

TF-IMRT

53.0  
50.0  
47.5  
40.0  
30.0  
20.0  
10.0

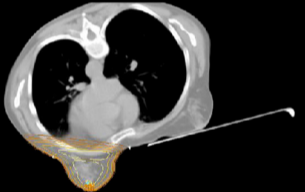

MB-IMRT

53.0  
50.0  
47.5  
40.0  
30.0  
20.0  
10.0

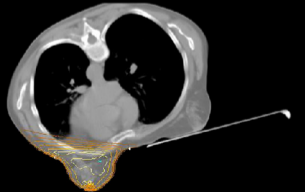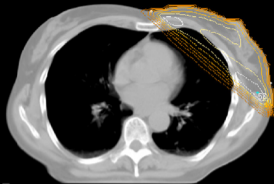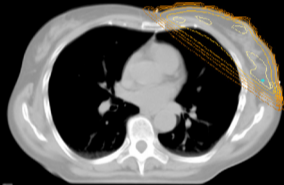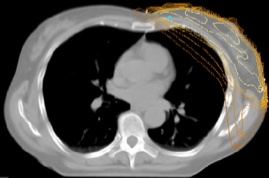

Supplement: MOESM2 [file 9634340]
